# Supplementary material for: Corrigendum to “Determination of Serum Lost Goodwill Target Proteome in Patients with Severe Traumatic Brain Injury”
Source: Biomed Res Int. 2018 Aug 23;2018:5234910. doi: 10.1155/2018/5234910 (PMC6126061; doi:10.1155/2018/5234910)
Supplement: Supplementary Materials — The original data is included as Supplementary Materials. [file 5234910.f1.zip]

Archive with 37 entries (30 files):
- Original Data/
- Original Data/Data 1/
- Original Data/Data 1/╒┼╕╒└√╩2╛▌/
- Original Data/Data 1/╒┼╕╒└√╩2╛▌/╒┼╕╒└√╩2╛▌/
- Original Data/Data 1/╒┼╕╒└√╩2╛▌/╒┼╕╒└√╩2╛▌/π╞═≥╔·.doc
- Original Data/Data 1/╒┼╕╒└√╩2╛▌/╒┼╕╒└√╩2╛▌/└ε╕╗.doc
- Original Data/Data 1/╒┼╕╒└√╩2╛▌/╒┼╕╒└√╩2╛▌/┴⌡╧■└┌.doc
- Original Data/Data 1/╒┼╕╒└√╩2╛▌/╒┼╕╒└√╩2╛▌/┴╓═Ñ╕ú.doc
- Original Data/Data 1/╒┼╕╒└√╩2╛▌/╒┼╕╒└√╩2╛▌/═⌡║ú╛n.doc
- Original Data/Data 1/╒┼╕╒└√╩2╛▌/╒┼╕╒└√╩2╛▌/║┬╣≡╔╜.doc
- Original Data/Data 1/╒┼╕╒└√╩2╛▌/╒┼╕╒└√╩2╛▌/║═╒2║ú.doc
- Original Data/Data 1/╒┼╕╒└√╩2╛▌/╒┼╕╒└√╩2╛▌/╒╘╧═╟┐.doc
- Original Data/Data 1/╒┼╕╒└√╩2╛▌/╒┼╕╒└√╩2╛▌/╓▄╜¿║Ω.doc
- Original Data/Data 1/╒┼╕╒└√╩2╛▌/╒┼╕╒└√╩2╛▌/╕▀╜°▓┼.doc
- Original Data/Data 1/╒┼╕╒└√╩2╛▌/╒┼╕╒└√╩2╛▌/╖«╟∩╣≤.doc
- Original Data/Data 1/╒┼╕╒└√╩2╛▌/╒┼╕╒└√╩2╛▌/╙┌╣π║∞.doc
- Original Data/Data 1/╒┼╕╒└√╩2╛▌/╒┼╕╒└√╩2╛▌/╟╟╨π┴1⁄2.doc
- Original Data/Data 1/╒┼╕╒└√╩2╛▌/╒┼╕╒└√╩2╛▌/╢╘╒╒╫Θ.doc
- Original Data/Data 1/╒┼╕╒└√╩2╛▌/╒┼╕╒└√╩2╛▌/╣∙╛n╞╜.doc
- Original Data/Data 1/╒┼╕╒└√╩2╛▌/╒┼╕╒└√╩2╛▌/╤ε╩≈╩ñ.doc
- Original Data/Data 1/╒┼╕╒└√╩2╛▌/╒┼╕╒└√╩2╛▌/病例血清标本收集表.doc
- Original Data/Data 2/
- Original Data/Data 2/▓╣│Σ╡─╩2╛▌/
- Original Data/Data 2/▓╣│Σ╡─╩2╛▌/▓╣│Σ╡─╩2╛▌/
- Original Data/Data 2/▓╣│Σ╡─╩2╛▌/▓╣│Σ╡─╩2╛▌/│ú╓╛╕╒.doc
- Original Data/Data 2/▓╣│Σ╡─╩2╛▌/▓╣│Σ╡─╩2╛▌/┐▄╚¿.doc
- Original Data/Data 2/▓╣│Σ╡─╩2╛▌/▓╣│Σ╡─╩2╛▌/└ε┴┴.doc
- Original Data/Data 2/▓╣│Σ╡─╩2╛▌/▓╣│Σ╡─╩2╛▌/└ε╕∙│⌠.doc
- Original Data/Data 2/▓╣│Σ╡─╩2╛▌/▓╣│Σ╡─╩2╛▌/┴⌡╩≈┴╓.doc
- Original Data/Data 2/▓╣│Σ╡─╩2╛▌/▓╣│Σ╡─╩2╛▌/═⌡╘╞│╔.doc
- Original Data/Data 2/▓╣│Σ╡─╩2╛▌/▓╣│Σ╡─╩2╛▌/═⌡╜¿╛n.doc
- Original Data/Data 2/▓╣│Σ╡─╩2╛▌/▓╣│Σ╡─╩2╛▌/╒┼┐í╖╝.doc
- Original Data/Data 2/▓╣│Σ╡─╩2╛▌/▓╣│Σ╡─╩2╛▌/╓ú╜≡├╖.doc
- Original Data/Data 2/▓╣│Σ╡─╩2╛▌/▓╣│Σ╡─╩2╛▌/╕▀╚≡├≈.doc
- Original Data/Data 2/▓╣│Σ╡─╩2╛▌/▓╣│Σ╡─╩2╛▌/╟±╓╛▒°.doc
- Original Data/Data 2/▓╣│Σ╡─╩2╛▌/▓╣│Σ╡─╩2╛▌/╣∙╩╪┴╓.doc
- Original Data/Data 2/▓╣│Σ╡─╩2╛▌/▓╣│Σ╡─╩2╛▌/病例血清标本收集表(补充).doc
